# Supplementary material
Source: PubMed Central journal article supplement (PMC7162557)
Supplement: NIHMS1560576-supplement-Supplementary_Material.pdf [file NIHMS1560576-supplement-Supplementary_Material.pdf]

1 **Urban Airborne Particle Exposure Impairs Human Lung and Blood**  
2 ***Mycobacterium tuberculosis* Immunity**

3

4 Martha Torres, Claudia Carranza, Srijata Sarkar, Yolanda Gonzalez, Alvaro Osornio  
5 Vargas, Kathleen Black, Qingyu Meng, Raul Quintana-Belmares, Martha Hernandez,  
6 Jose Juan Felipe Angeles Garcia, Victor Hugo Páramo-Figueroa, Marco Iñiguez, Jose  
7 L. Flores, Junfeng (Jim) Zhang, Carol R. Gardner, Pamela Ohman-Strickland and  
8 Stephan Schwander

9

10 **Online Data Supplement**

11

12 **METHODS**

13

14 **Human Participants**

15 Participants were residents of Iztapalapa (the most populous municipality in Mexico  
16 City) or the neighboring Iztacalco for a minimum of one year prior to their study  
17 inclusion. Of the 35 participants, six were TST positive (>10 mm, Mantoux method, 5U  
18 Turbesol, Canada), 29 TST-negative, two interferon gamma release assay (IGRA)-  
19 positive and 33 IGRA-negative. Participant numbers for each experiment are shown in  
20 the corresponding figures and their legends

21

22 **Primary Human Immune Cells**

23 PBMC were obtained by gradient centrifugation from whole heparinized peripheral  
24 venous blood using Lymphocyte Separation Medium (Bio Whittaker, LONZA) as

25 described previously (Supplementary Fig. 1). BAC from participants were obtained by  
26 bronchoalveolar lavage at the bronchoscopy suite of the INER using 150mL of sterile  
27 0.9% sodium chloride solution in a segment of each right and left lung as described  
28 previously (Supplementary Fig.2).

29 PBMC and BAC (viability  $\geq 93\%$ , trypan blue exclusion) were suspended in  
30 complete culture medium [RPMI (BioWhittaker, Walkersville, MD, USA) + 10% pooled  
31 human AB serum (Valley Biomedical, Inc.) + 2 mM L-glutamine. By cyto-spin analysis  
32 (n= 32) BAC consisted of 91.5% AM (mean; max. 99.3%, min. 76.3%), 8.5% alveolar  
33 lymphocytes (AL, mean; max. 23.7%, min. 0.7%) and scarce neutrophils. In addition,  
34 the macrophage population in BAC (n=8) was also determined based on forward angle  
35 and side scatter in flow cytometry (Supplementary Fig.1) and consisted of 85.64% AM  
36 (mean; max. 89%, min. 81.9%) and 10.8% AL (mean; max. 16.4%, min. 5.7%).

37

### 38 **Collection of Outdoor PM<sub>2.5</sub> in Mexico City and Preparation for *in vitro* Studies**

39 PM<sub>2.5</sub> was sampled for 24 h on Mondays, Wednesdays, and Fridays of every week  
40 between May 2012 and April 2013 comprising of the three weather seasons cold-dry  
41 (CD, November - February), warm-dry (WD, March – May) and rainy (R, June –  
42 October) using a high volume sampler (TE6070V-2.5, Tisch Environmental, Inc.;  
43 Village of Cleves, OH, USA, airflow rate 1.13 m<sup>3</sup>min<sup>-1</sup>) to obtain adequate amounts of  
44 PM<sub>2.5</sub> on modified nitrocellulose membranes (Supplementary Figs. 3, 4). PM<sub>2.5</sub> was  
45 mechanically recovered from the membranes, pooled by month and stored in endotoxin-  
46 free glass vials at 4°C, in the dark, in a desiccator after assessing the total PM<sub>2.5</sub>  
47 monthly mass. A yearly pool and pools from each weather season were created using

48 monthly PM<sub>2.5</sub> aliquots according to the proportional contribution to the total PM<sub>2.5</sub> mass  
49 by the monthly PM samples. Immediately prior to *in vitro* exposure experiments, PM<sub>2.5</sub>  
50 was weighed on a precision balance Sartorius CPA225D (Göttingen, Germany),  
51 autoclaved (121°C, 15 min), and suspended in complete culture medium. Following  
52 sonication for 5 minutes (351OR-DTH; Branson, Danbury, CT, USA), PM<sub>2.5</sub> suspensions  
53 were diluted to final concentrations of 0.1, 1, 5 and 10 µg/ml.

54

### 55 **Preparation of *M.tb* for *In vitro* Infections**

56 *M.tb* H37Ra (ATCC 25177, Manassas, VA) was grown in Middlebrook 7H9 broth (BD  
57 Difco, Sparks, Maryland, USA) supplemented with BBL Middlebrook ADC Enrichment  
58 (10% albumin dextrose catalase, BD Difco) and 0.2% glycerol (Fisher Scientific, Fair  
59 Lawn, NJ, USA). After 21 days of incubation at 37°C in a shaking incubator, *M.tb*  
60 cultures were harvested, centrifuged at 2095 x *g* (3000 rpm) for 30 min, room  
61 temperature (RT) and suspended in Middlebrook 7H9 broth medium with 6% glycerol  
62 (Fisher Scientific, Fair Lawn, NJ). Mycobacteria were then aliquoted in cryotubes and  
63 stored at -70°C until use. Colony-forming unit (CFU) counts from serial dilutions on  
64 7H10 agar plates (Sigma-Aldrich, Fluka. MO, USA) were performed to determine  
65 concentrations of the resulting *M.tb* stock. For *in vitro* infection experiments, frozen  
66 aliquots of *M.tb* H37Ra (ATCC 25177, Manassas, VA) were thawed, centrifuged for 8  
67 minutes at 5220xg (8000 rpm), resuspended in complete medium, disaggregated by  
68 vortexing five minutes in the presence of five sterile 3-mm glass beads and centrifuged  
69 at 350 x *g* (1000 rpm) for 2 minutes to generate single-cell suspensions of *M.tb*.

70

## 71 **Phagocytosis of *M.tb* by human AM**

72 To assess phagocytosis of *M.tb*, BAC ( $2 \times 10^4$ /well) were placed in 8-well chamber  
73 slides and exposed to PM<sub>2.5</sub> (1 µg and 5 µg/ml) for 18 h, subsequently infected with *M.tb*  
74 for 2h (37°C, 5% CO<sub>2</sub>) at multiplicities of infection (MOI) of 0.1, 0.5, 1 and 5, washed  
75 (RPMI 3x) to remove extracellular *M.tb* and stained by Kinyoun (AlphaTec. WA. USA).  
76 Proportions of cells containing one or more intracellular *M.tb* were determined by bright  
77 field microscopy (1000x, oil immersion) on cytospin preparations in a total of 300  
78 randomly selected AM from each study participant at each experimental condition.

79

## 80 **Cell viability, necrosis and apoptosis**

81 Briefly,  $10^4$  to  $10^6$  cells were resuspended in 1 ml of protein-free buffer, mixed with 1 µl  
82 of diluted staining reagent and incubated 30 minutes on ice. After washing once with 1  
83 ml of PBS, cells were resuspended in 200 µl of PBS and viability analyzed by flow  
84 cytometry with fluorescence detection at 660 nm (FACSFusion; BD Biosciences, San  
85 Jose, CA). Differences in intensity between live and dead cell populations were typically  
86 greater than 50-fold. Cell viability was expressed in percentages of untreated cells  
87 (controls).

88 For MTS assay, BAC and PBMC were seeded in 96-well plates at densities of  
89 200,000 and 50,000 cells/well, respectively, and incubated in a total volume of 200 µL in  
90 triplicate. Cells were incubated with PM<sub>2.5</sub> suspensions (0.1, 1, 10 and 25 µg/ml) and  
91 culture medium (viability control) for 24, 48 and 72 h (humidified, 37°C, 5% CO<sub>2</sub>).  
92 Absorbance was quantified at 490 nm using a microplate reader (Multiskan Ascent,  
93 Thermo Electron Co., Shanghai, China). Cell viability was expressed as a percentage of

94 unexposed cells (control). For the detection of Apoptosis/Necrosis,  $10^6$  BAC or PBMC  
95 were placed in ultra-low attachment 24-well plates, exposed to  $PM_{2.5}$  at final  
96 concentrations of 0.1, 1, 10 and 25  $\mu\text{g/ml}$  and incubated for 24, 48 and 72h. Cells  
97 incubated in culture medium alone or in culture medium with 2  $\mu\text{M}$  of staurosporine  
98 (apoptosis inducer) were included as negative and positive controls, respectively.

99

### 100 **Assessment of *in vivo* PM burden in AM**

101 The ranges used for the size and shape of the particles were: size 0 -  $\infty$   $\mu\text{m}$  and  
102 circularity 0.00 - 1.00, where 1 equals the perfect circle. Image adjustment was used  
103 with color threshold images analyzed with a range of (HSB): Hue 50-229, saturation 60 -  
104 255, brightness 25 - 140. Thresholding method: default. Threshold color: network. Color  
105 Space: HSB. The Overlay Mask function was used to show particle contours in the  
106 superposition of images.

107

### 108 **Cytokine ELISPOT Assays**

109 BAC and PBMC were added into Multi Screen HTS 96-flat bottom well plates coated  
110 with appropriate antibodies in duplicate (200  $\mu\text{l/well}$ ) at optimal densities determined in  
111 earlier studies and based on frequency of spot-forming cells (IFN- $\gamma$ :  $2 \times 10^4$  BAC,  $2 \times 10^5$   
112 PBMC; TNF- $\alpha$ :  $2 \times 10^2$  BAC,  $2 \times 10^3$  PBMC; IL-1 $\beta$ :  $2 \times 10^4$  BAC,  $2 \times 10^5$  PBMC; IL-6:  $10^3$   
113 BAC,  $2 \times 10^3$  PBMC), incubated in the presence of 0, 0.1, 1, 10, 25  $\mu\text{g/ml}$   $PM_{2.5}$  and  
114 infected simultaneously with *M.tb* (MOI 1, 5, 10) or stimulated with PPD (10 $\mu\text{g/ml}$ ), or 6  
115 kDa early secretory antigenic target (ESAT-6, 10 $\mu\text{g/ml}$ ) at 37°C in 5%  $\text{CO}_2$  for 24 h  
116 (simultaneous exposure). Unexposed/uninfected control cells were incubated in

117 complete culture medium. Cytokine spot-forming cells (SFC) were enumerated with an  
118 ImmunoSpot Analyzer and Image Acquisition 4.5 Software (Cellular Technology Ltd,  
119 Cleveland, OH, USA) and frequencies of IL-1 $\beta$ , TNF- $\alpha$ , IL-6 and IFN- $\gamma$ -producing cells  
120 calculated by averaging spot numbers from duplicate wells after background  
121 subtraction. Results are expressed as SFC/10<sup>6</sup> BAC or PBMC.

122

### 123 **Western Blotting**

124 To examine the activation of signaling pathways involved in the induction of cytokines,  
125 levels of P-I $\kappa$ B- $\alpha$ , P-STAT1, P-ERK1/2 and GAPDH (Cell Signaling Technologies,  
126 Danver, MA) were assessed by western blotting. BAC (7.5 x 10<sup>5</sup>) and PBMC (2 x 10<sup>6</sup>)  
127 were placed in 24-well plates and lysed by incubating for 30 min on ice in RIPA (radio  
128 immunoprecipitation assay) lysis buffer system (Santa Cruz Biotechnology, Dallas, TX)  
129 containing 2 mM PMSF, protease inhibitor cocktail, and 1 mM sodium orthovanadate  
130 and supernatants were collected following centrifugation at 10,000 g for 10 min at 4°C.  
131 Protein lysates were analyzed on 10% SDS/PAGE in Tris-Glycine buffer and transferred  
132 onto PVDF membrane. After blocking in 5% milk in TBST (150 mM NaCl, 50 mM Tris-  
133 HCl, pH 7.5, 0.05% Tween 20) for 1 hour at room temperature, membranes were  
134 incubated with appropriate antibody overnight at 4°C. Following incubation, membranes  
135 were washed 3-4 times in TBST and incubated with HRP-conjugated secondary  
136 antibody at room temperature for 1 hour. After washing four times in TBST, protein  
137 specific bands were visualized with enhanced chemiluminescence substrate Western  
138 Lightning Plus-ECL (PerkinElmer, Waltham, MA).

139

140 **Statistical analysis**

141 Statistical analyses were performed using GraphPad Prism, version 5.0 (GraphPad  
142 Software Inc., San Diego, CA, USA). Types of statistical analysis used for experiments  
143 and conditions are indicated in the corresponding figure legends in the Results section.

144

145 **SUPPLEMENTARY FIGURES**

146

147 **Supplementary Figure 1. Cytotoxic effect of PM<sub>2.5</sub>.** PBMC or BAC were exposed to  
148 PM and incubated for 24-72h to evaluate PM<sub>2.5</sub> exposure effects on membrane  
149 permeability and induction of apoptosis and necrosis. Permeability of PBMC and BAC  
150 membranes was evaluated by flow cytometry. Individual cells from an exemplary BAC  
151 sample were selected in SS-A and SS-H (A), lymphocyte and macrophage  
152 subpopulations identified (B) and single histogram plots generated to identify live  
153 lymphocytes and macrophages using LIVE/DEAD Fixable Far Red Dead Cell Stain (C,  
154 D).

155

156 **Supplementary Figure 2. PM<sub>2.5</sub> does not affect *M.tb* phagocytosis by AM.** AM were  
157 pre-exposed to PM<sub>2.5</sub> cold-dry, warm-dry, rainy weather seasons at 0 and 1 µg/ml (A)  
158 and 5 µg/ml (B) for 24 h, infected with *M.tb* MOI 0.1, 0.5, 1 and 5 for 2 h and proportions  
159 of AM with intracellular *M.tb* determined by bright field microscopy (1000x, oil  
160 immersion) on Kinyoun-stained cytopspins assessing a total of 300 AM in each  
161 experimental condition.

162

163 **Supplementary Figure 3. Effect of PM<sub>2.5</sub> on *M.tb*-induced Cytokine Production in**  
164 **BAC and PBMC.** Optimal densities of BAC and PBMC (n=9) were exposed to PM<sub>2.5</sub> (0,  
165 0.1, 1 and 10 µg/ml) and simultaneously infected with *M.tb* or left uninfected for 24h.  
166 Frequencies of IL-1β, TNF-α, IL-6 and IFN-γ spot-forming cells were evaluated by  
167 ELISpot assay. Images of representative IL-1β, TNF-α, IL-6 and IFN-γ-producing BAC  
168 showing cytokine spot formation and identification in *in vitro* PM-exposed and *M.tb*-  
169 infected cells for image analysis and automated counting (A). Frequencies of  
170 constitutively (unstimulated) IFN-γ, IL-1β, IL-6, and TNF-α-producing BAC (open circles)  
171 and PBMC (black circles) (B). Frequencies of IL-1β (C), TNF-α (D) IL-6 (E) and IFN-γ  
172 production (E) in response to *in vitro* PM exposure (left column panels) and *M.tb*  
173 infection (right column panels) by BAC (open circles) and PBMC (black circles). Each  
174 data point represents an individual participant and horizontal lines indicate medians.  
175 Asterisks indicate significant differences ( $p \leq 0.05$ , ANOVA Friedman test followed  
176 Dunn's multiple comparisons test using the GraphPad prism software for Mac OS X  
177 version 6.0) relative to PM<sub>2.5</sub>-unexposed control cells.

178  
179 **Supplementary Figure 4. Activation of signaling pathways.** BAC and PBMC from  
180 three participants (1-3) were infected with *M.tb* at MOI1 and 5 or stimulated with PPD or  
181 left unstimulated (constitutive) for 24h. Protein lysates were analyzed with SDS/PAGE  
182 followed by western blotting for Phospho-IκBα (Ser32/36), Phospho-STAT1 (Tyr701)  
183 and Phospho-Erk1/2 (Thr202/Tyr204), and GAPDH.

184  
185 **REFERENCES**



- 186 S1. Boyum A. Isolation of lymphocytes, granulocytes and macrophages. *Scandinavian journal of*  
187 *immunology* 1976; Suppl 5: 9-15.
- 188 S2. Juarez E, Nunez C, Sada E, Ellner JJ, Schwander SK, Torres M. Differential expression of  
189 Toll-like receptors on human alveolar macrophages and autologous peripheral monocytes.  
190 *Respir Res* 2010; 11: 2.
- 191 S3. Manzano-Leon N, Serrano-Lomelin J, Sanchez BN, Quintana-Belmares R, Vega E,  
192 Vazquez-Lopez I, Rojas-Bracho L, Lopez-Villegas MT, Vadillo-Ortega F, De Vizcaya-Ruiz  
193 A, Perez IR, O'Neill MS, Osornio-Vargas AR. TNFalpha and IL-6 Responses to Particulate  
194 Matter in Vitro: Variation According to PM Size, Season, and Polycyclic Aromatic  
195 Hydrocarbon and Soil Content. *Environ Health Perspect* 2016; 124: 406-412.
- 196 S4. Alfaro-Moreno E, Torres V, Miranda J, Martinez L, Garcia-Cuellar C, Nawrot TS,  
197 Vanaudenaerde B, Hoet P, Ramirez-Lopez P, Rosas I, Nemery B, Osornio-Vargas AR.  
198 Induction of IL-6 and inhibition of IL-8 secretion in the human airway cell line Calu-3 by  
199 urban particulate matter collected with a modified method of PM sampling. *Environmental*  
200 *Research* 2009; 109: 528-535.
- 201 S5. Schwander SK, Sada E, Torres M, Escobedo D, Sierra JG, Alt S, Rich EA. T lymphocytic  
202 and immature macrophage alveolitis in active pulmonary tuberculosis. *J Infect Dis* 1996;  
203 173: 1267-1272.
- 204 S6. Schwander SK, Torres M, Carranza CC, Escobedo D, Tary-Lehmann M, Anderson P,  
205 Toossi Z, Ellner JJ, Rich EA, Sada E. Pulmonary mononuclear cell responses to antigens  
206 of *Mycobacterium tuberculosis* in healthy household contacts of patients with active  
207 tuberculosis and healthy controls from the community. *J Immunol* 2000; 165: 1479-1485.
- 208 S7. Schwander SK, Torres M, Sada E, Carranza C, Ramos E, Tary-Lehmann M, Wallis RS,  
209 Sierra J, Rich EA. Enhanced responses to *Mycobacterium tuberculosis* antigens by human  
210 alveolar lymphocytes during active pulmonary tuberculosis. *J Infect Dis* 1998; 178: 1434-  
211 1445.

212 S8. Carranza C, Juarez E, Torres M, Ellner JJ, Sada E, Schwander SK. Mycobacterium  
213 tuberculosis growth control by lung macrophages and CD8 cells from patient contacts. Am  
214 J Respir Crit Care Med 2006; 173: 238-245.

215 S9. Sarkar S, Leo BF, Carranza C, Chen S, Rivas-Santiago C, Porter AE, Ryan MP, Gow A,  
216 Chung KF, Tetley TD, Zhang JJ, Georgopoulos PG, Ohman-Strickland PA, Schwander S.  
217 Modulation of Human Macrophage Responses to Mycobacterium tuberculosis by Silver  
218 Nanoparticles of Different Size and Surface Modification. PLoS One 2015; 10: e0143077.
