# Supplementary material
Source: PubMed Central journal article supplement (PMC7162557)

Torres M. et al., Supplement Figure 1.

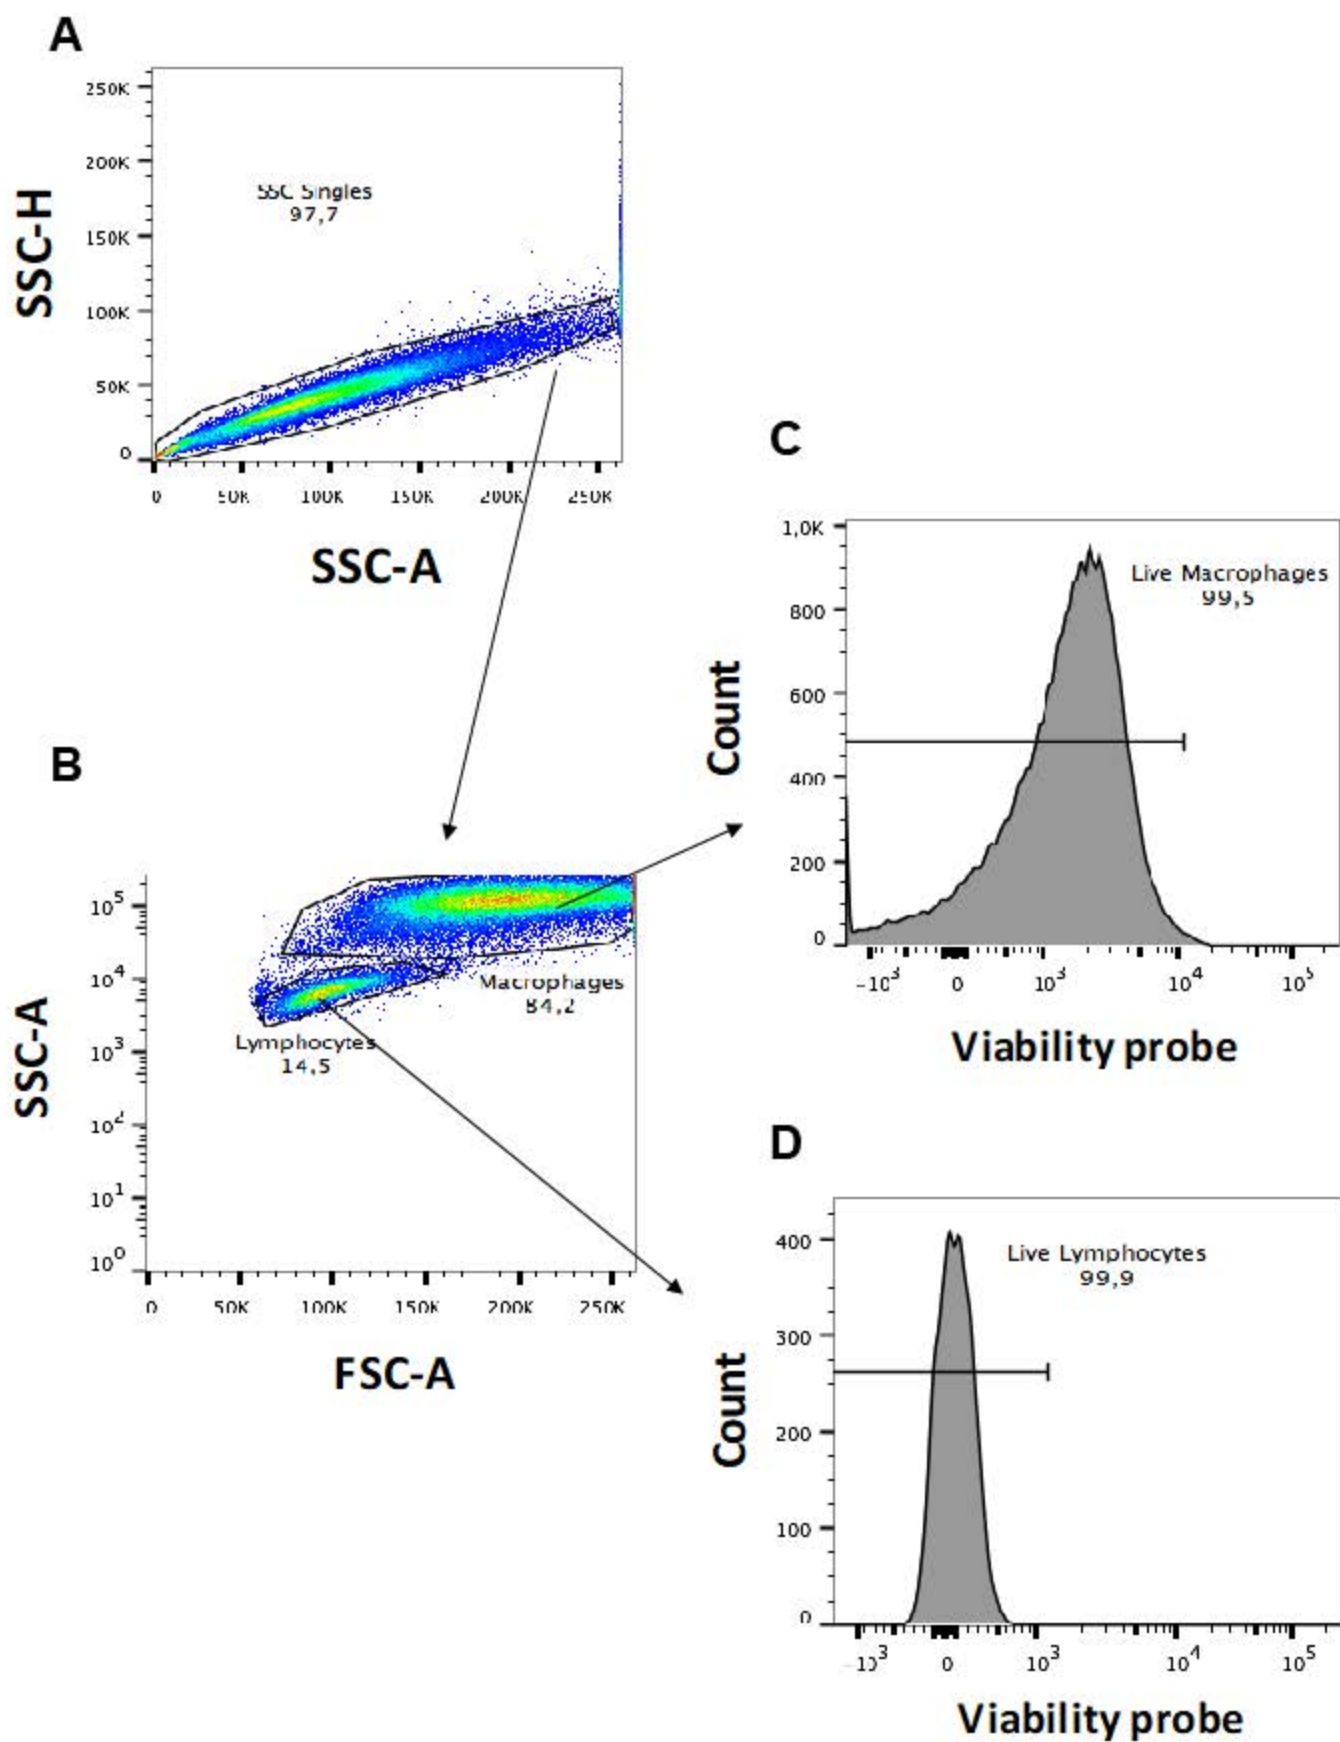

Supplement: NIHMS1560576-supplement-Supplementary_Material_2.pdf [file NIHMS1560576-supplement-Supplementary_Material_2.pdf]

Torres M. et al., Supplement Figure 2.

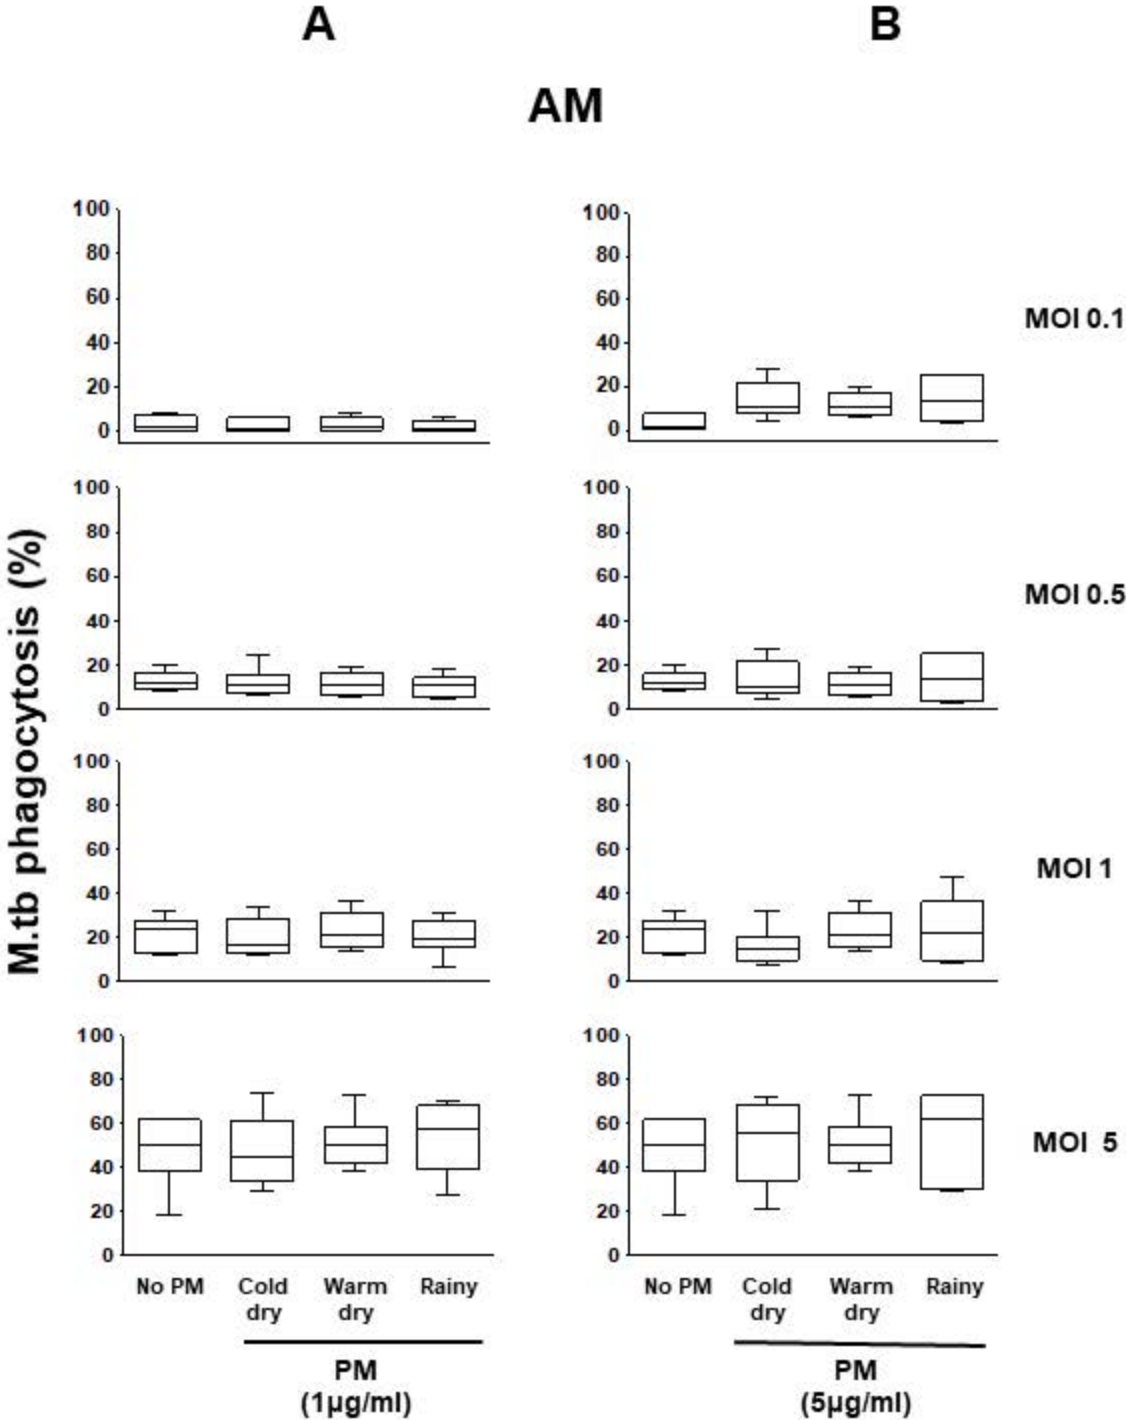

Supplement: NIHMS1560576-supplement-Supplementary_Material_3.pdf [file NIHMS1560576-supplement-Supplementary_Material_3.pdf]

Torres M. et al., Supplement Figure 3.

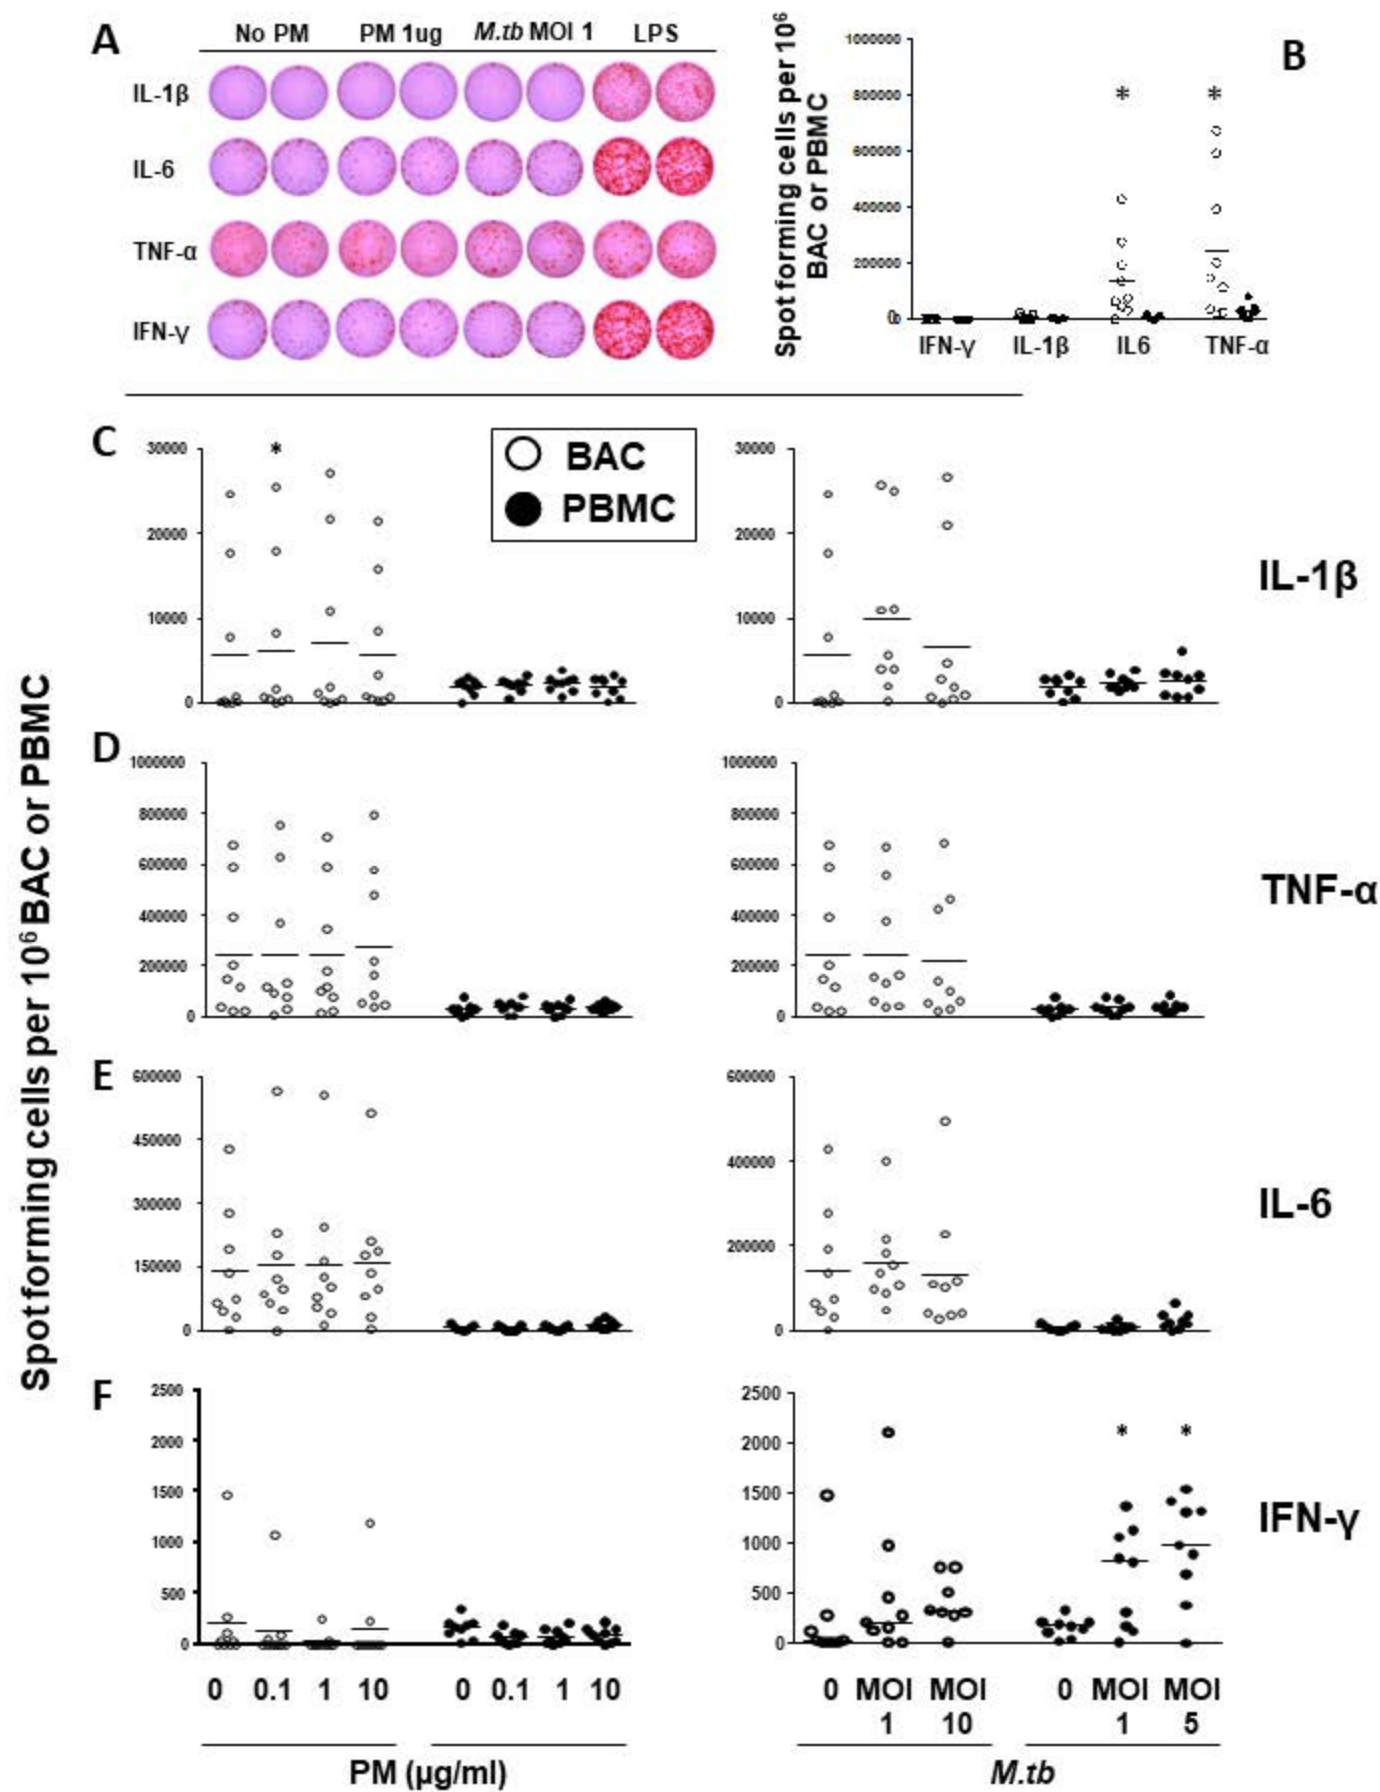

Supplement: NIHMS1560576-supplement-Supplementary_Material_4.pdf [file NIHMS1560576-supplement-Supplementary_Material_4.pdf]

Torres M. et al., Supplement Figure 4.

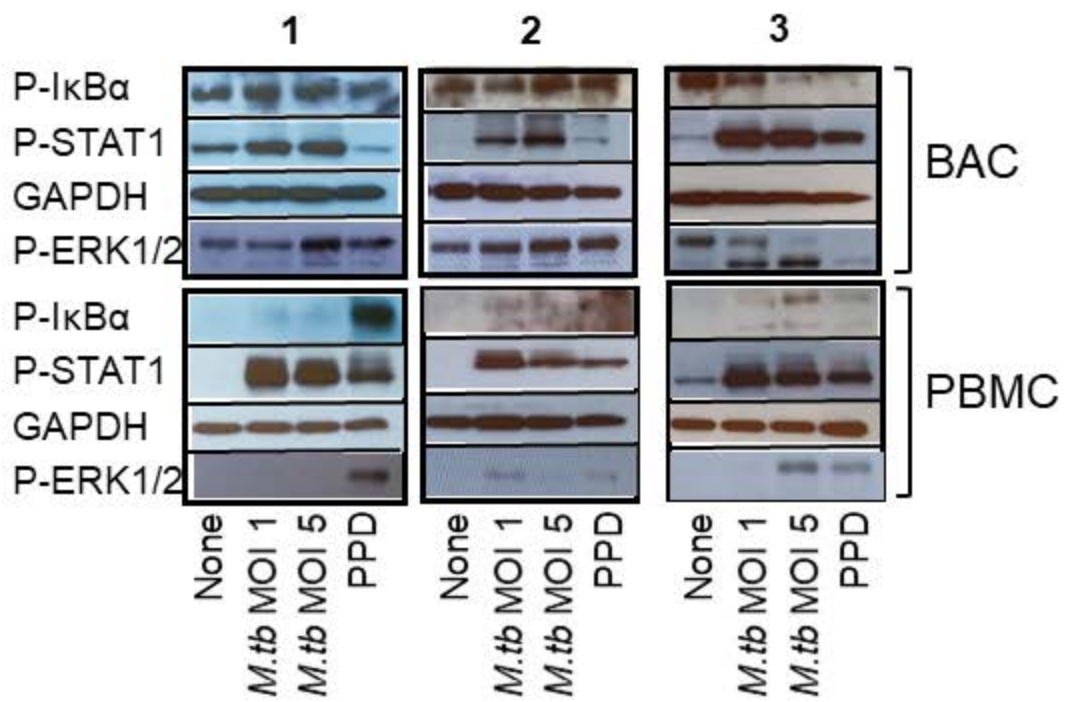

Supplement: NIHMS1560576-supplement-Supplementary_Material_5.pdf [file NIHMS1560576-supplement-Supplementary_Material_5.pdf]
